# Supplementary material for: The ORFeome of Staphylococcus aureus v 1.1
Source: PubMed Central journal article supplement (PMC2474624; doi:10.1186/1471-2164-9-321), 2008-07-07

**A**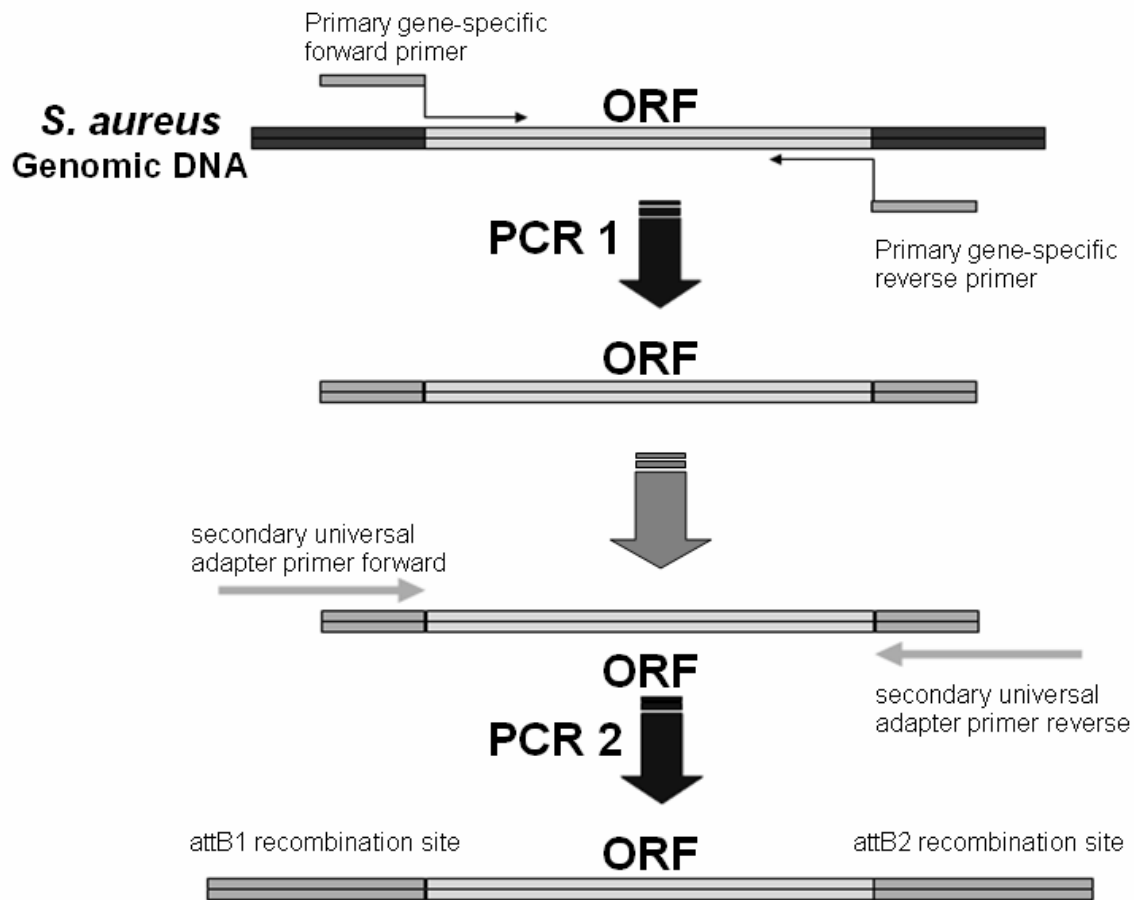**B**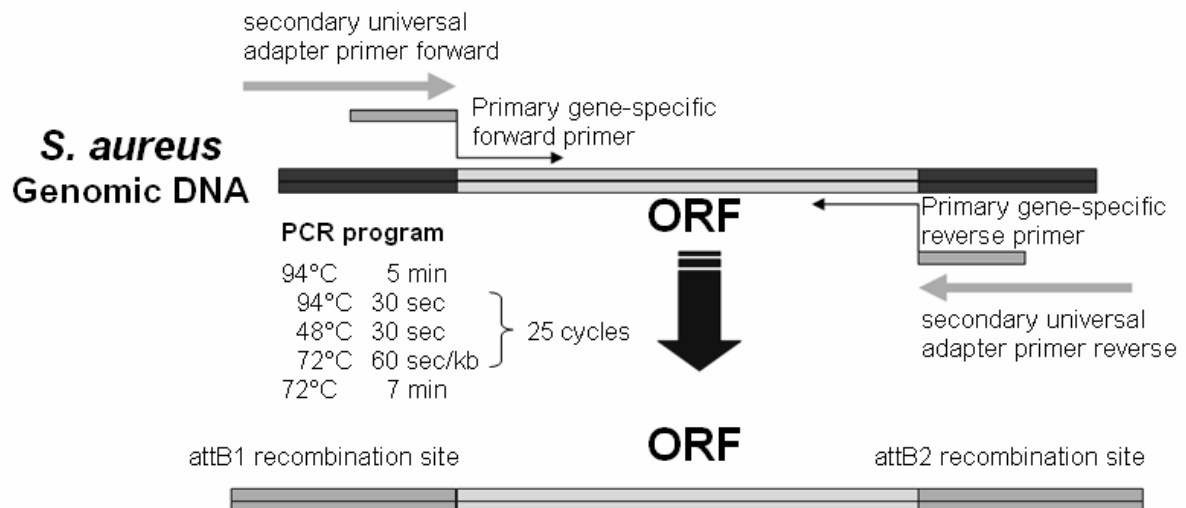

Supplement: 1471-2164-9-321-S2.pdf [file 1471-2164-9-321-S2.pdf]
